# Supplementary material
Source: publisher figshare collection journal article supplement (https://acs.figshare.com/ndownloader/files/4616494)
Supplement: Supplementary file 1 [file 4616494]

## Supporting Information

### Micellization-Induced Conformational Change of a Chiral Proline Surfactant

Manli Deng, Xu Huang, Rongliang Wu<sup>†</sup>, and Yilin Wang<sup>\*</sup>

*Beijing National Laboratory for Molecular Sciences, Key Laboratory of Colloid and Interface Science, and <sup>†</sup>State Key Laboratory of Polymer Physics and Chemistry, Institute of Chemistry, Chinese Academy of Sciences, Beijing 100190, People's Republic of China*

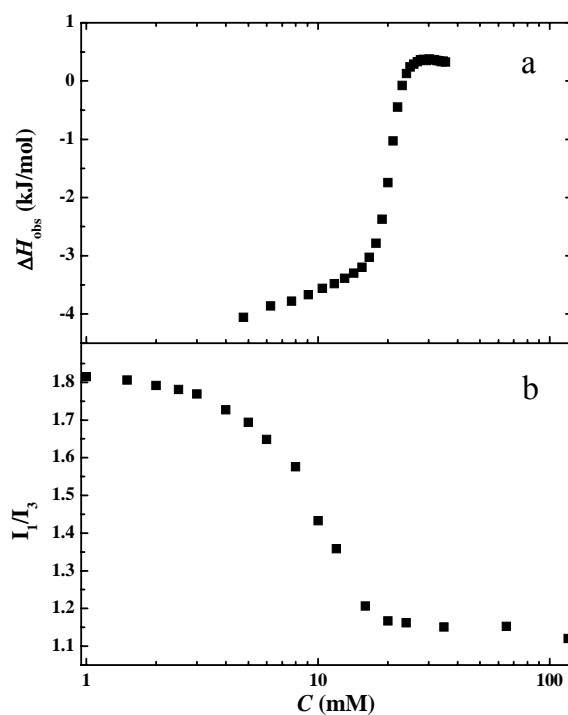

**Figure S1.** Variation of a) observed enthalpy and b) pyrene polarity index  $I_1/I_3$  with the SDHP concentration.

**Table S1.** pH values for SDHP solutions at different concentrations ( $pK_a = 4.9$ ).

| C (mM) | 4    | 10   | 80   |
|--------|------|------|------|
| pH     | 7.13 | 7.26 | 8.33 |

**Table S2.** The CMCs (mM) determined from NMR signals of different protons.

| signals  | CMC of <i>Z</i> | CMC of <i>E</i> | weighted apparent CMC |
|----------|-----------------|-----------------|-----------------------|
| $\gamma$ | 17.8            | 20.2            | 18.4                  |
| $\delta$ | 17.7            | 20.8            | 18.5                  |
